# Supplementary material for: Uncertainties, sensitivities and robustness of simulated water erosion in an EPIC-based global gridded crop model
Source: Copernicus journal article supplement (doi:10.5194/bg-17-5263-2020), 2020-11-05
Supplement: Supplementary file 1 [file bg-17-5263-2020-supplement.zip]

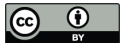

## *Supplement of*

# **Uncertainties, sensitivities and robustness of simulated water erosion in an EPIC-based global gridded crop model**

**Tony W. Carr et al.**

*Correspondence to:* Tony W. Carr ([tony.carr.16@ucl.ac.uk](mailto:tony.carr.16@ucl.ac.uk))

- [bg-17-5263-2020-supplement-title-page.pdf](#)
- TWCarr-si
  - TWCarr-si01.docx
  - TWCarr-si02.xlsx
  - TWCarr-si03.docx

The copyright of individual parts of the supplement might differ from the CC BY 4.0 License.
